# Supplementary material for: Dietary Patterns and Oral Health Behaviours Associated with Caries Development from 4 to 7 Years of Age
Source: MDPI journal article supplement (doi:10.3390/life11070609), 2021-06-24
Supplement: s1 [file s1]

## Supplementary materials:

Article

# Dietary Patterns and Oral Health Behaviours Associated with Caries Development from 4 to 7 Years of Age

Cátia Carvalho Silva <sup>1,2,\*</sup>, Sandra Gavinha <sup>2</sup>, Sofia Vilela <sup>3</sup>, Rita Rodrigues <sup>2</sup>, Maria Conceição Manso <sup>2,4,5</sup>, Milton Severo <sup>3,6</sup>, Carla Lopes <sup>3,6</sup> and Paulo Melo <sup>1,3</sup>

**Table S1.** Children's characteristics of the sample according to dental caries experience at 4 years of age ( $d_{3-6}mft=0$  vs.  $d_{3-6}mft>0$ ) and at 7-years of age ( $d_{3-6}mft/D_{3-6}MFT=0$  vs.  $d_{3-6}mft/D_{3-6}MFT>0$ ).

| Dental Caries Status                      |                                 |                                 |                  |                                                      |                                                      |                  |
|-------------------------------------------|---------------------------------|---------------------------------|------------------|------------------------------------------------------|------------------------------------------------------|------------------|
| 4 years of age                            |                                 |                                 |                  | 7 years of age                                       |                                                      |                  |
|                                           | d <sub>3-6</sub> mft=0<br>n (%) | d <sub>3-6</sub> mft>0<br>n (%) | p <sup>*</sup>   | d <sub>3-6</sub> mft/D <sub>3-6</sub> MFT=0<br>n (%) | d <sub>3-6</sub> mft/D <sub>3-6</sub> MFT>0<br>n (%) | p <sup>*</sup>   |
| Child's sex                               |                                 |                                 |                  |                                                      |                                                      |                  |
| Female                                    | 203 (46.1)                      | 86 (51.5)                       | 0.238            | 138 (49.6)                                           | 151 (45.9)                                           | 0.358            |
| Male                                      | 237 (53.9)                      | 81 (48.5)                       |                  | 140 (50.4)                                           | 178 (54.1)                                           |                  |
| Maternal education                        |                                 |                                 |                  |                                                      |                                                      |                  |
| ≤ 9 years                                 | 177 (40.4)                      | <b>82 (49.1)</b>                | <b>0.004</b>     | 94 (33.8)                                            | <b>165 (50.5)</b>                                    | <b>&lt;0.001</b> |
| 10-12 years                               | 126 (28.8)                      | 56 (33.5)                       |                  | 87 (31.3)                                            | 95 (29.1)                                            |                  |
| >12 years                                 | <b>135 (30.8)</b>               | 29 (17.4)                       |                  | <b>97 (34.9)</b>                                     | 67 (20.5)                                            |                  |
| Monthly household income                  |                                 |                                 |                  |                                                      |                                                      |                  |
| Lower: ≤1000€                             | 92 (21.2)                       | 71 (43.0)                       | <b>&lt;0.001</b> | 51 (18.5)                                            | 112 (34.6)                                           | <b>&lt;0.001</b> |
| Intermediate: 1001-1500€                  | 121 (27.9)                      | 44 (26.7)                       |                  | 68 (24.7)                                            | 97 (29.9)                                            |                  |
| Higher: >1500€                            | 221 (50.9)                      | 50 (30.3)                       |                  | 156 (56.7)                                           | 115 (35.5)                                           |                  |
| Toothbrushing frequency                   |                                 |                                 |                  |                                                      |                                                      |                  |
| < 2 or ≥ 2 times per day, none at bedtime | 194 (44.7)                      | 81 (49.0)                       | 0.306            | 114 (41.5)                                           | 161 (49.8)                                           | <b>0.040</b>     |
| ≥ 2 times per day, 1 at bedtime           | 240 (55.3)                      | 83 (50.6)                       |                  | 161 (58.5)                                           | 162 (50.2)                                           |                  |
| Fluoride toothpaste                       |                                 |                                 |                  |                                                      |                                                      |                  |
| No                                        | 1 (0.2)                         | 1 (0.6)                         | 0.469            | 12 (5.8)                                             | 17 (7.0)                                             | 0.607            |
| Yes                                       | 434 (99.8)                      | 161 (99.4)                      |                  | 194 (94.2)                                           | 225 (93.0)                                           |                  |
| Parental-supervised toothbrushing         |                                 |                                 |                  |                                                      |                                                      |                  |
| No                                        | 269 (64.4)                      | 131 (82.9)                      | <b>&lt;0.001</b> | 256 (93.8)                                           | 288 (88.3)                                           | <b>0.022</b>     |
| Yes                                       | 149 (35.6)                      | 27 (17.1)                       |                  | 17 (6.2)                                             | 38 (11.7)                                            |                  |
| Dental appointment at 4-year-old          |                                 |                                 |                  |                                                      |                                                      |                  |
| No                                        | 314 (71.9)                      | 88 (52.7)                       | <b>&lt;0.001</b> | 188 (68.4)                                           | 214 (65.0)                                           | 0.389            |
| Yes                                       | 123 (28.1)                      | 79 (47.3)                       |                  | 87 (31.6)                                            | 115 (35.0)                                           |                  |
| Eating before go to bed                   |                                 |                                 |                  |                                                      |                                                      |                  |
| No                                        | 252 (58.3)                      | 90 (54.5)                       | 0.403            | 169 (62.4)                                           | 173 (53.1)                                           | <b>0.022</b>     |
| Yes                                       | 180 (41.7)                      | 75 (45.5)                       |                  | 102 (37.6)                                           | 153 (46.9)                                           |                  |
| Dietary patterns                          |                                 |                                 |                  |                                                      |                                                      |                  |
| Energy-dense foods                        | 189 (43.5)                      | 85 (51.5)                       | <b>0.048</b>     | 107 (38.8)                                           | 167 (51.7)                                           | <b>0.002</b>     |
| Snacking                                  | 55 (12.7)                       | 26 (15.8)                       |                  | 36 (13.0)                                            | 45 (13.9)                                            |                  |
| Healthier                                 | 190 (43.8)                      | 54 (32.7)                       |                  | 133 (48.2)                                           | 111 (34.4)                                           |                  |
| Daily frequency of cariogenic food intake |                                 |                                 |                  |                                                      |                                                      |                  |
| n                                         | 325                             | 118                             | 0.822            | 204                                                  | 239                                                  | 0.349            |
| Median (IQR)                              | 2.76 (1.98-3.84)                | 2.81 (1.72-4.23)                |                  | 2.72 (2.01-3.68)                                     | 2.82 (1.84-4.04)                                     |                  |

| Dental Caries Status                               |                                              |                                                 |                             |                                                                  |                                                                     |                             |
|----------------------------------------------------|----------------------------------------------|-------------------------------------------------|-----------------------------|------------------------------------------------------------------|---------------------------------------------------------------------|-----------------------------|
|                                                    | 4 years of age                               |                                                 |                             | 7 years of age                                                   |                                                                     |                             |
|                                                    | <b>d<sub>3-6</sub>dmft=0</b><br><b>n (%)</b> | <b>d<sub>3-6</sub>dmft&gt;0</b><br><b>n (%)</b> | <b><i>p</i><sup>*</sup></b> | <b>d<sub>3-6</sub>dmft/D<sub>3-6</sub>DMFT=0</b><br><b>n (%)</b> | <b>d<sub>3-6</sub>dmft/D<sub>3-6</sub>DMFT&gt;0</b><br><b>n (%)</b> | <b><i>p</i><sup>*</sup></b> |
| <b>Daily frequency of cariogenic drinks intake</b> |                                              |                                                 |                             |                                                                  |                                                                     |                             |
| n                                                  | 326                                          | 118                                             |                             | 205                                                              | 239                                                                 |                             |
| Median (IQR)                                       | 0.67 (0.26-1.26)                             | 0.98 (0.42-1.98)                                | <b>0.001</b>                | 0.65 (0.26-1.26)                                                 | 0.87 (0.34-1.48)                                                    | <b>0.020</b>                |

Bold entries denote statistical significance ( $p<0.05$ ); \* $p$ -value: Mann-Whitney U-test, chi-square test or Fisher's Exact test, as appropriate;  $p<0.001$  (Bonferroni correction); dmft, decayed missing and filled primary teeth; DMFT: decayed missing and filled permanent teeth; IQR, Interquartile Range.
